# Supplementary material for: pH-assisted crystallization of Cu2O: chemical reactions control the evolution from nanowires to polyhedra
Source: Royal Society of Chemistry journal article supplement (doi:10.1039/c2ce26084k), 2012-01-01
Supplement: c2ce26084k.pdf [file c2ce26084k.pdf]

# Supporting Information

## **pH-assisted crystallization of Cu<sub>2</sub>O: chemical reactions control the evolution from nanowire to polyhedron**

Kunfeng Chen,<sup>a,b</sup> and Dongfeng Xue<sup>\*,a,b</sup>

<sup>a</sup>School of Chemical Engineering, Dalian University of Technology, Dalian 116024,  
China

<sup>b</sup>State Key Laboratory of Rare Earth Resource Utilization, Changchun Institute of  
Applied Chemistry, Chinese Academy of Sciences, Renmin Street No. 5625,  
Changchun 130022, China

\* Corresponding author. E-mail: dongfeng@ciac.jl.cn

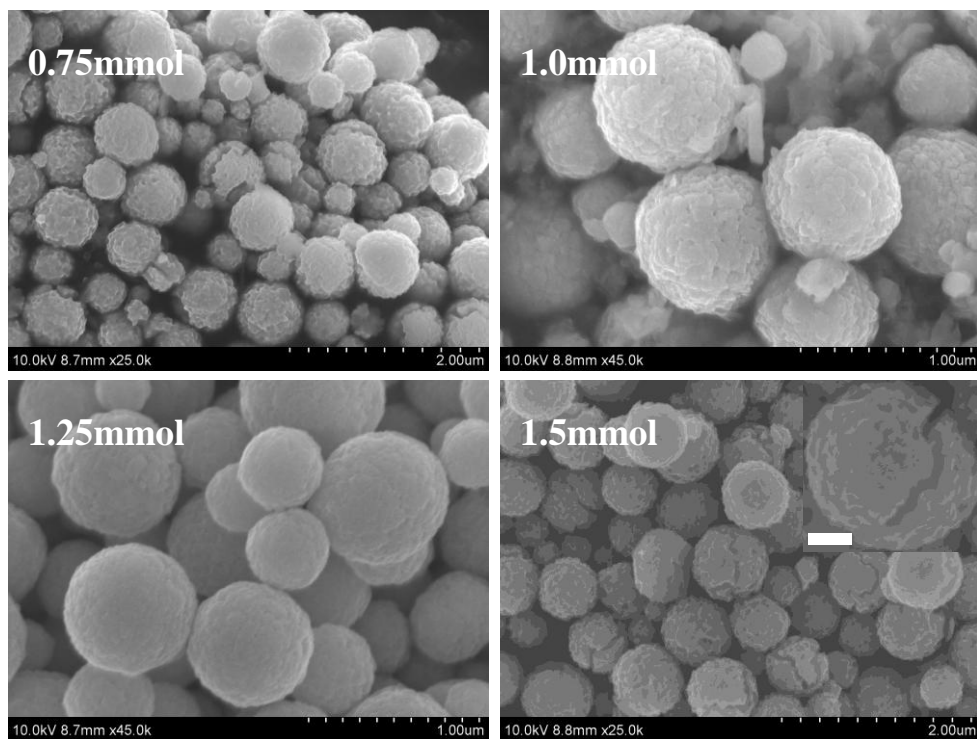

Figure S1. SEM images of different Cu<sub>2</sub>O morphologies synthesized with starch as reducing agent at 100 °C solution reactions with adding different concentrations of NaOH (indicated in the graphs). Scale bar of inset is 200 nm.

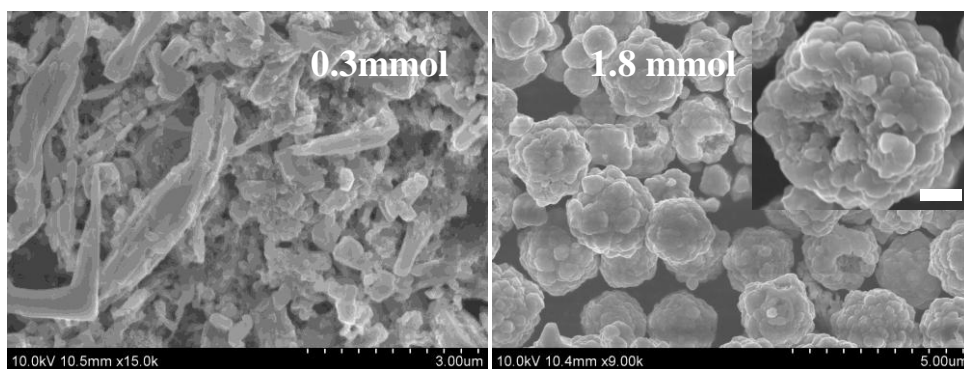

Fig. S2 SEM images of products synthesized with glucose as reducing agent and different amounts of  $\text{Na}_2\text{CO}_3$  as alkali (indicated in the graphs) at 100 °C hydrothermal reactions. Scale bar of inset is 500 nm.

Table S1 Discharge capacity of Cu<sub>2</sub>O electrodes with different compositions and morphologies as supercapacitor.

| Sample                                                                                                               | Discharge capacity F/g |      |      | Discharge curves |
|----------------------------------------------------------------------------------------------------------------------|------------------------|------|------|------------------|
|                                                                                                                      | 1st                    | 3rd  | 5th  |                  |
| nanowires<br>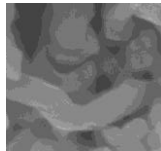                       | 57.6                   | 62.9 | 65.6 | Fig. S3          |
| nanoparticle-aggregated sphere<br> | 32.1                   | 34.0 | 35.6 | Fig. S4          |
| cuboctahedron<br>                 | 35.9                   | 38.2 | 40.2 | Fig. S5          |
| truncated octahedron<br>          | 26.8                   | 29.4 | 30.8 | Fig. S6          |

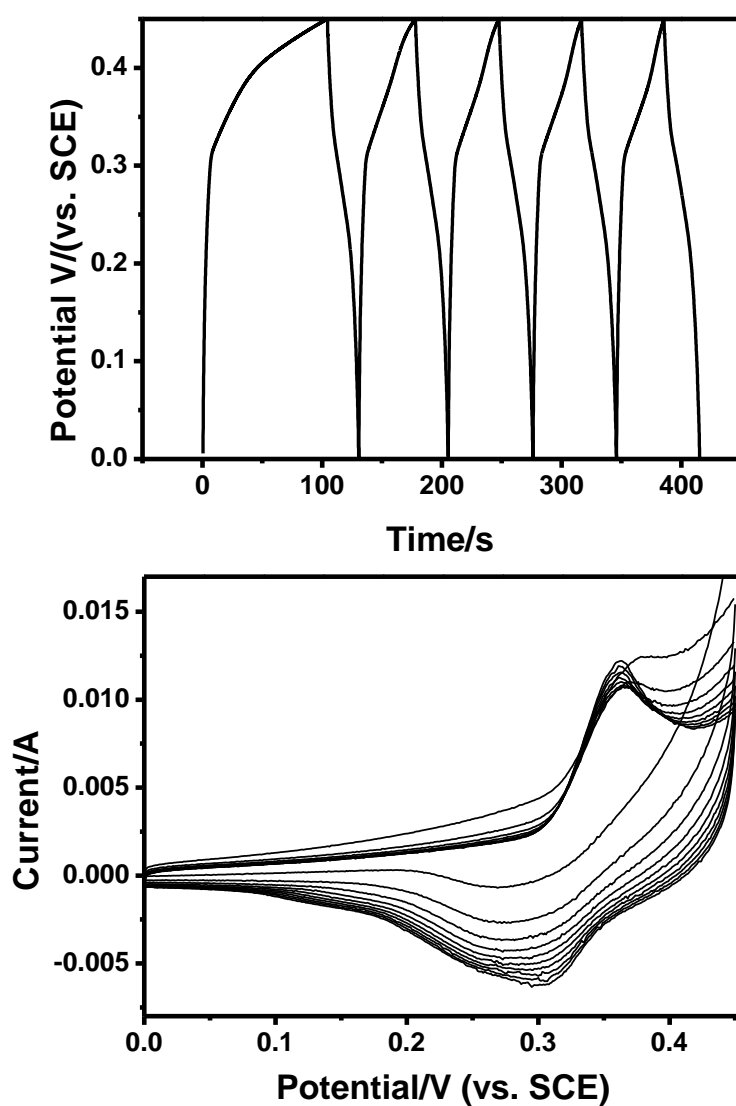

Fig. S3 Discharge curves and cyclic voltammograms of the nanowires electrode at current densities of 1 A/g and at a scan rate of 0.05 V/s in 1 M KOH solution.

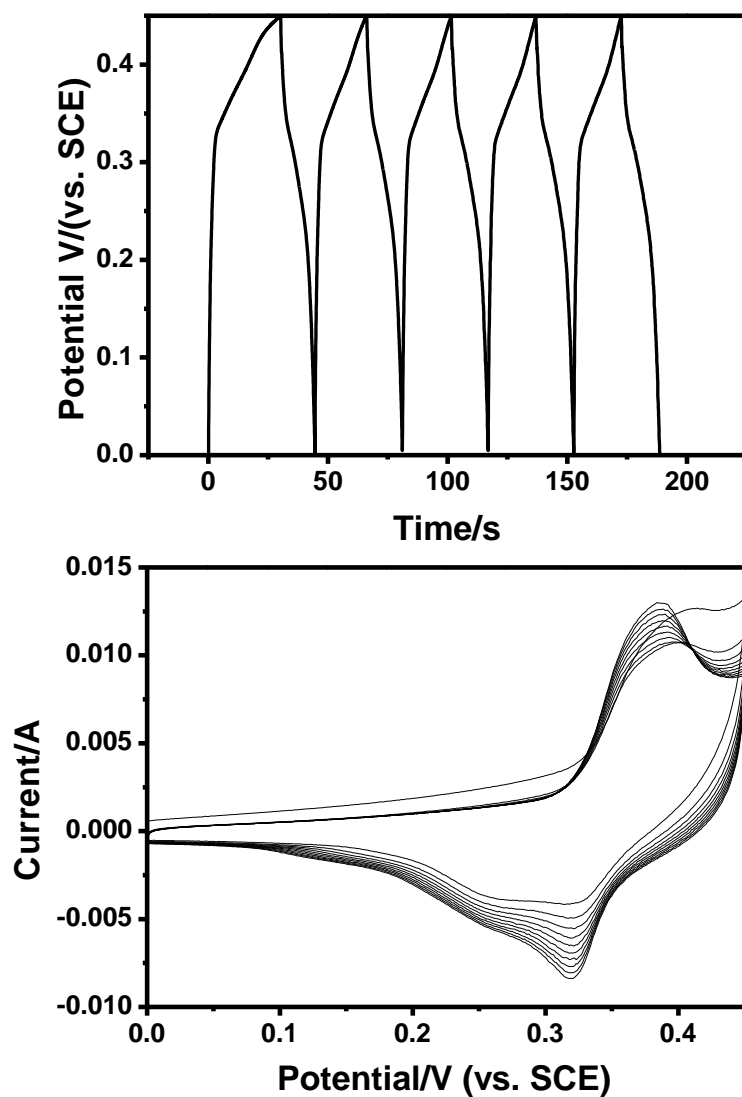

Fig. S4 Discharge curves and cyclic voltammograms of the nanoparticle-aggregated spheres electrode at current densities of 1 A/g and at a scan rate of 0.05 V/s in 1M KOH solution.

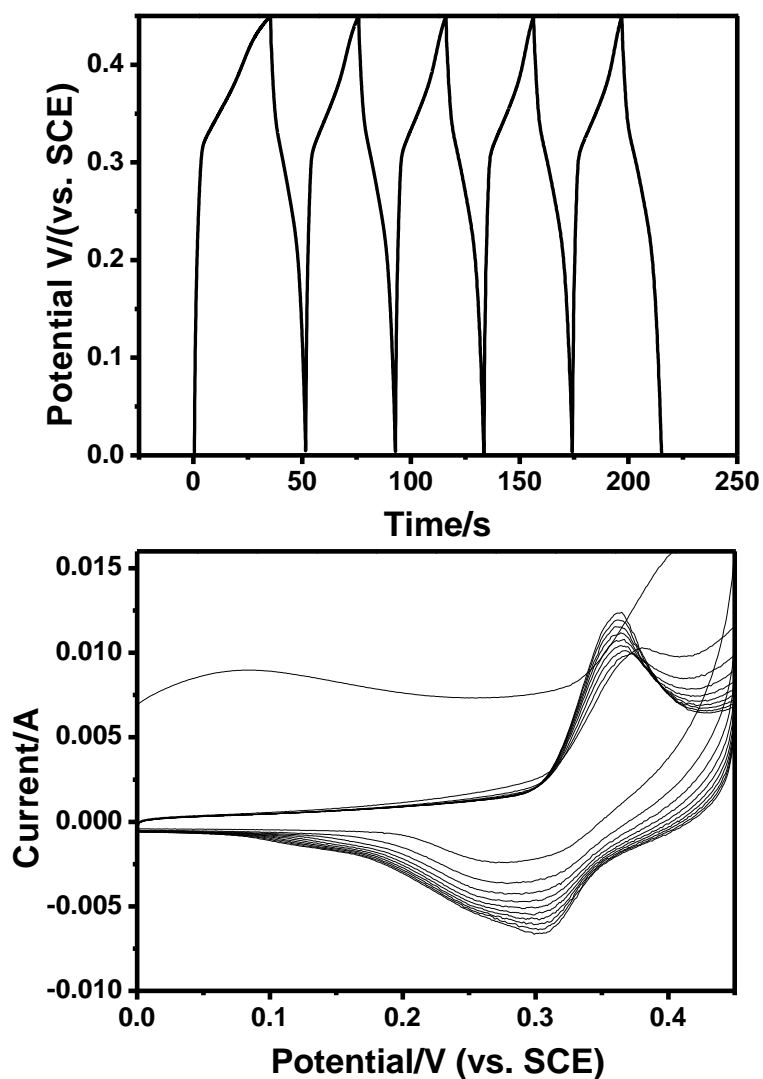

Fig. S5 Discharge curves and cyclic voltammograms of the cuboctahedrons electrode at current densities of 1 A/g and at a scan rate of 0.05 V/s in 1 M KOH solution.

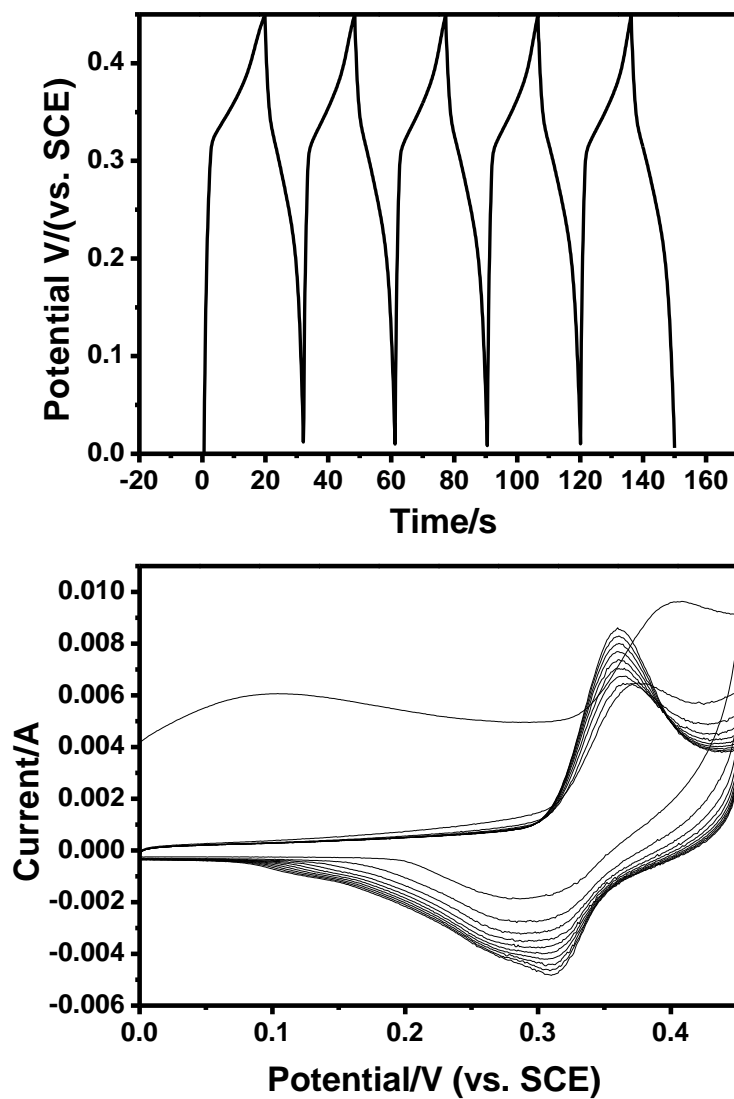

Fig. S6 Discharge curves and cyclic voltammograms of the truncated octahedrons electrode at current densities of 1 A/g and at a scan rate of 0.05 V/s in 1 M KOH solution.
